# Supplementary material for: Identification, molecular docking, and protective effects on H2O2-induced HEK-293 cell oxidative damage of antioxidant peptides from Pacific saury (Cololabis saira)
Source: Royal Society of Chemistry journal article supplement (doi:10.1039/d2fo02910c), 2022-12-07
Supplement: d2fo02910c1.pdf [file d2fo02910c1.pdf]

1 **Figure captions**

2 **Fig. S1** MS/MS spectra of identified peptides.

3 **Fig. S2** Molecular docking results and 2D graph of interactions between identified peptides and  
4 the receptor MPO.

5 **Fig. S3** ROS flow cytograms of H<sub>2</sub>O<sub>2</sub>-induced oxidative damage in HEK-293 cell treated by  
6 identified peptides.

7 **Fig. S1**

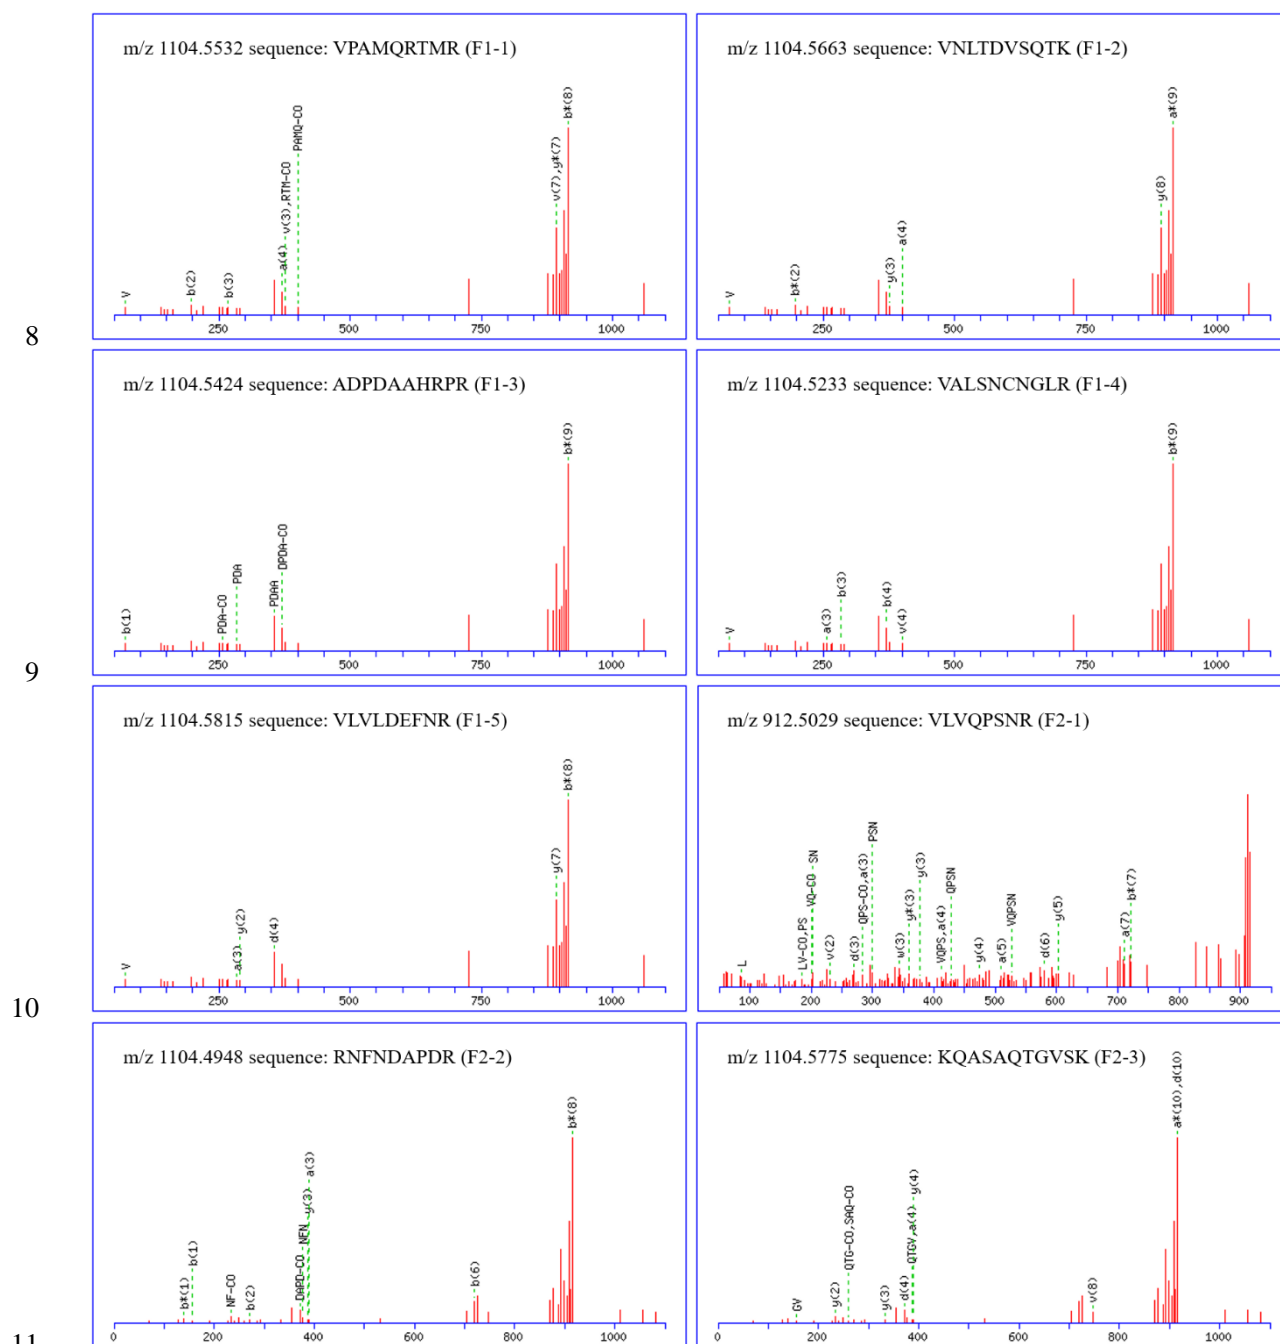

12

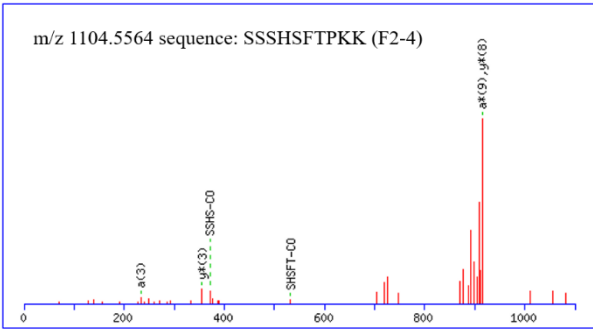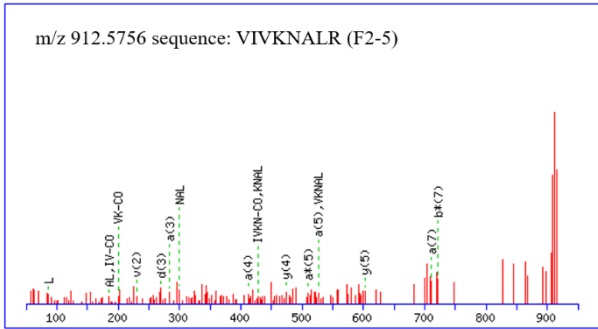

13

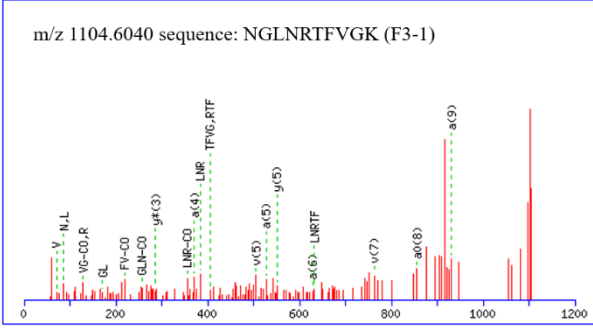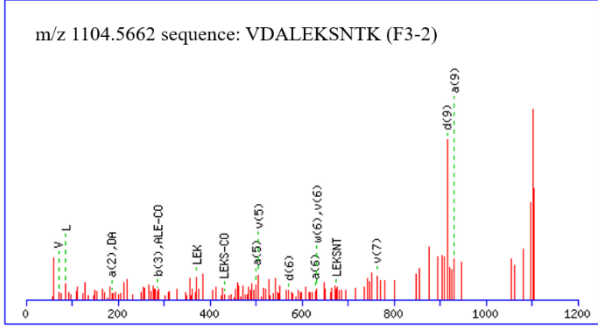

14

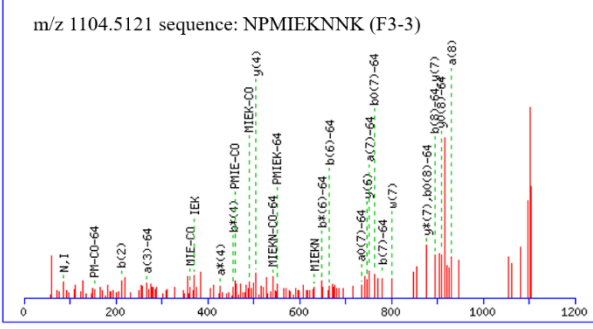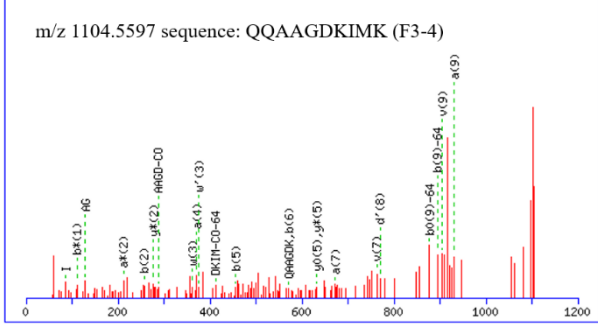

15

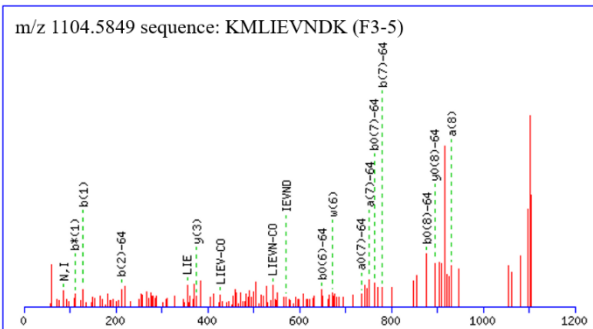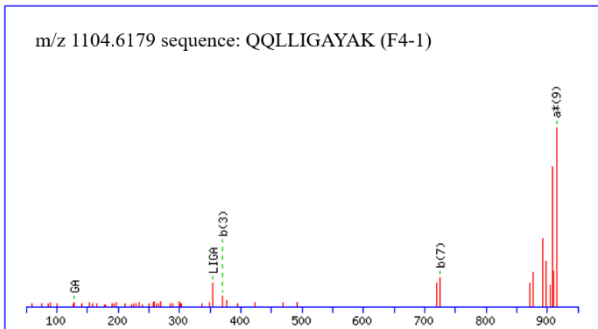

16

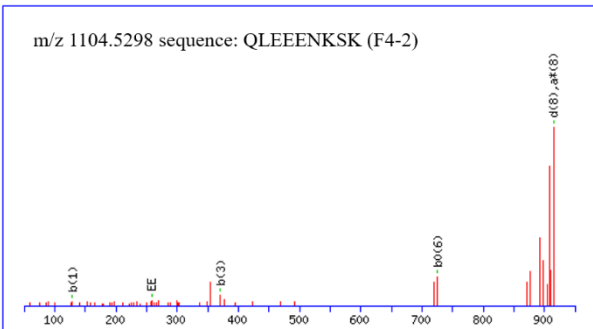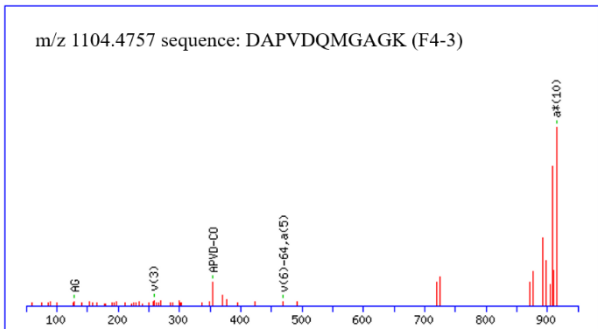

17

18

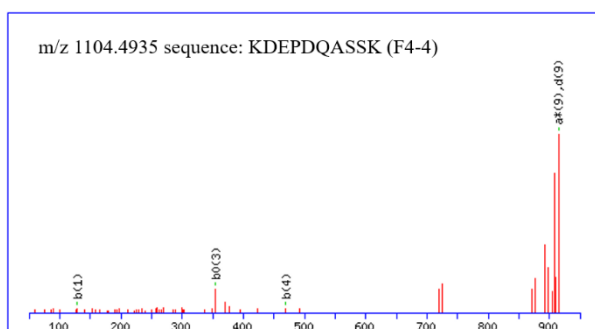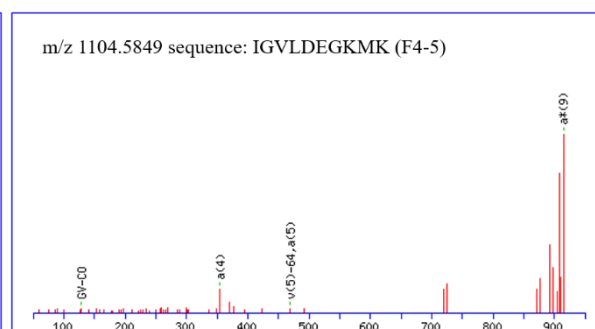







33 NGLNRRTFVGK

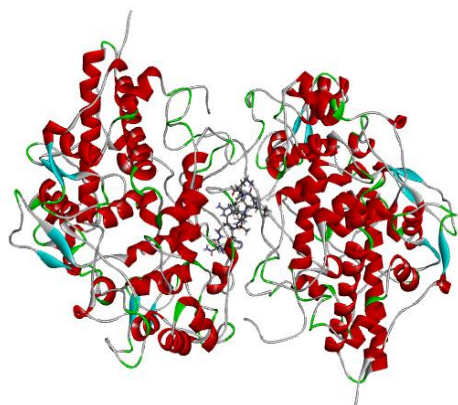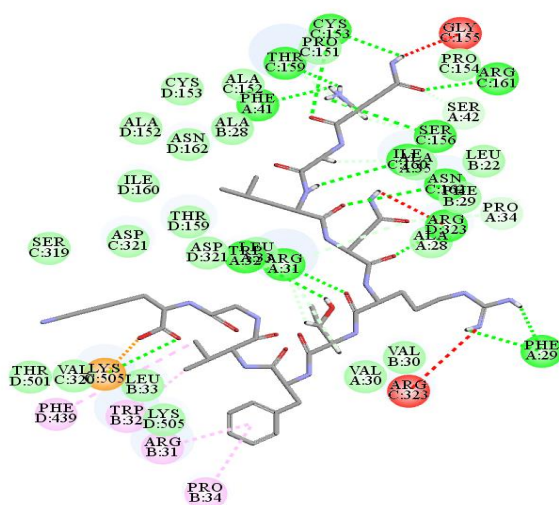

34  
35 VDALEKSNTK

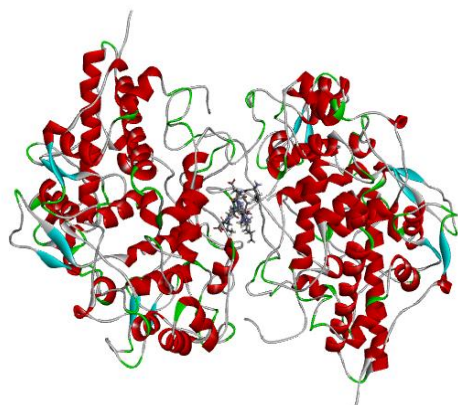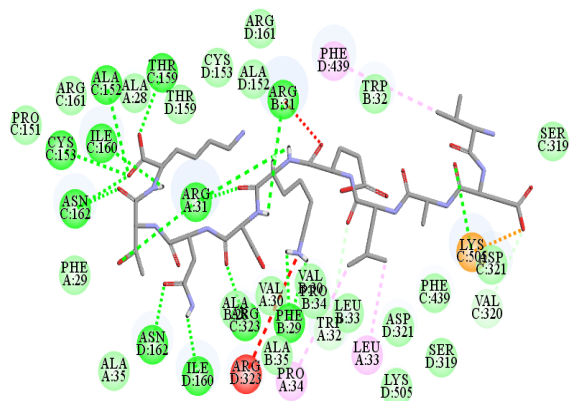

36  
37 NPMIEKNNK

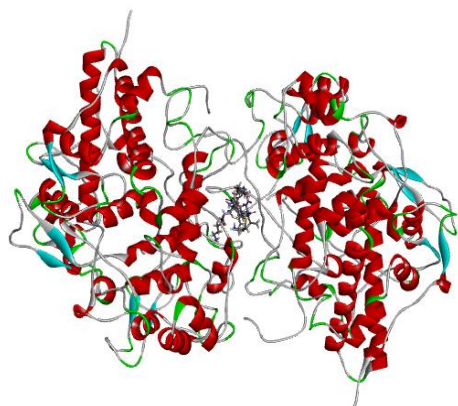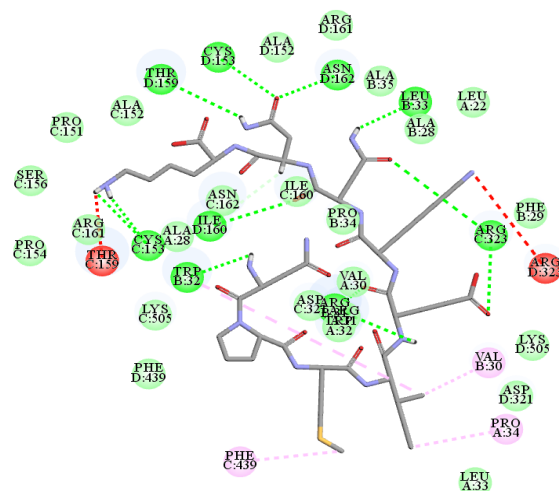

38  
39

40 QQAAGDKIMK

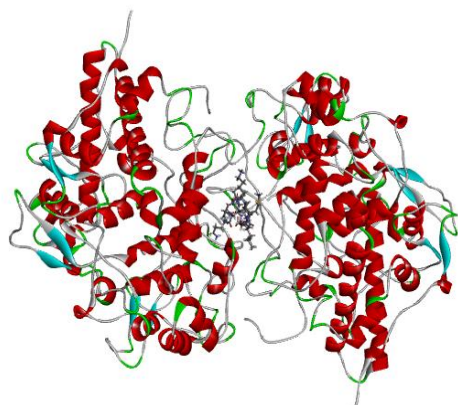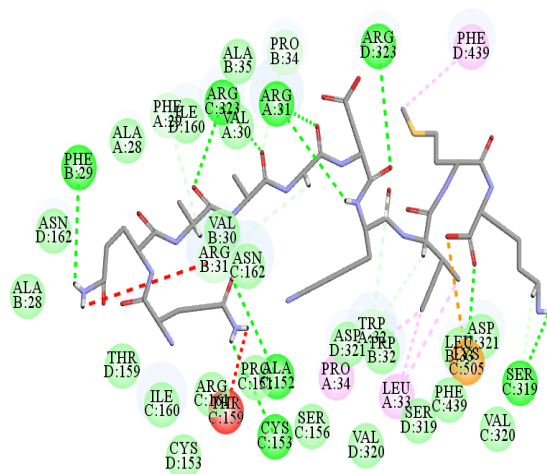

41  
42 KMLIEVNDK

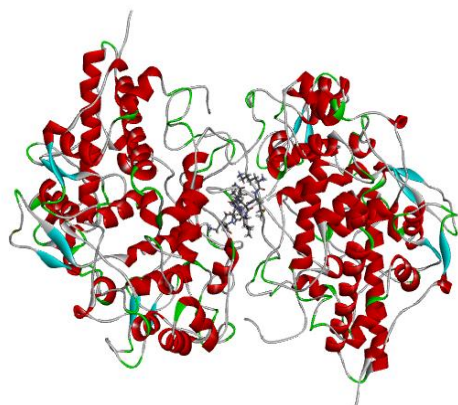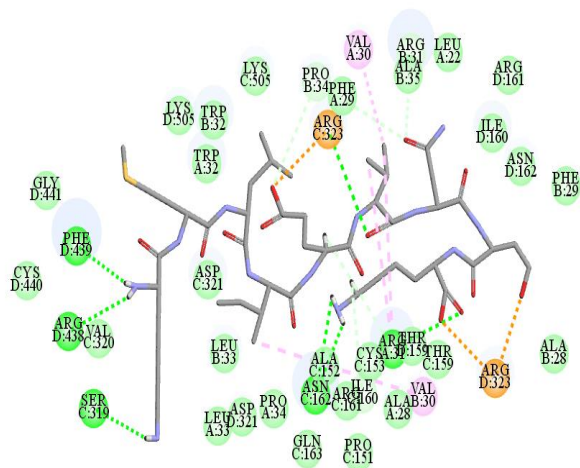

43  
44 QLEENKSK

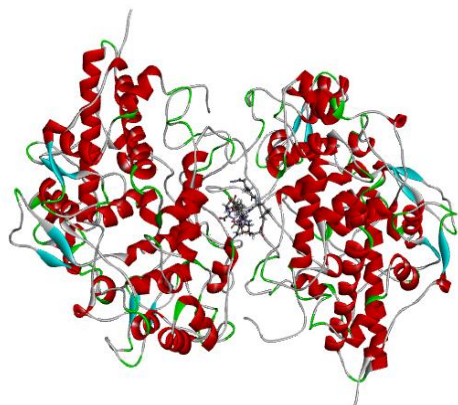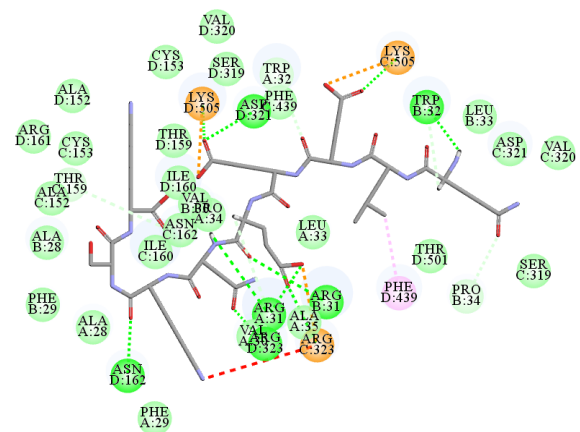

45

46 DAPVDQMGAGK

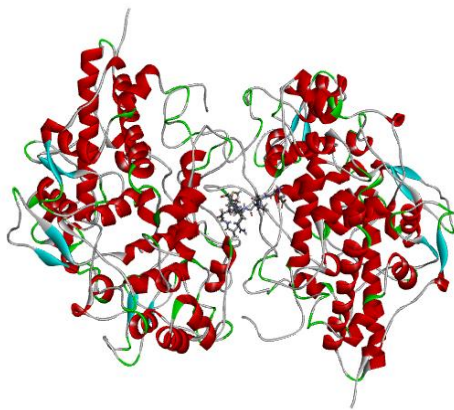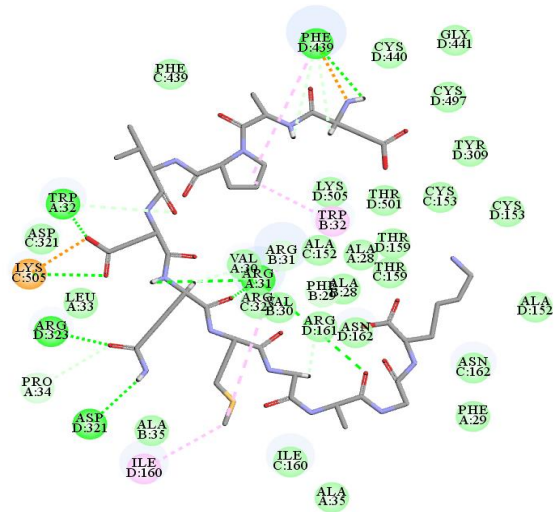

47

48 KDEPDQASSK

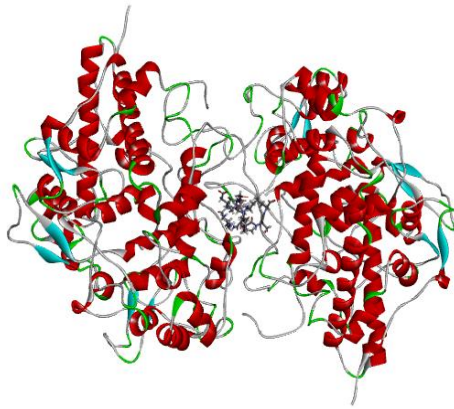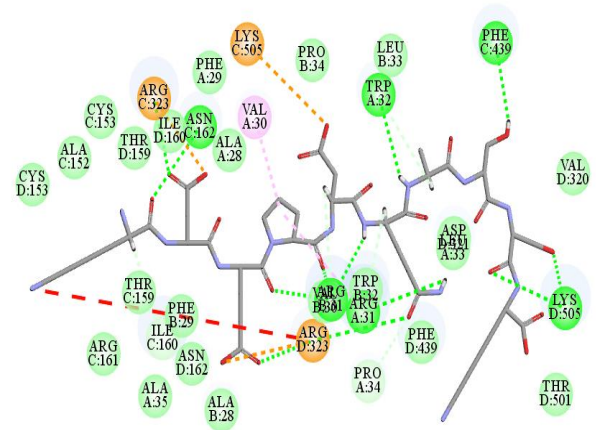

49

50 IGVLDEGKMK

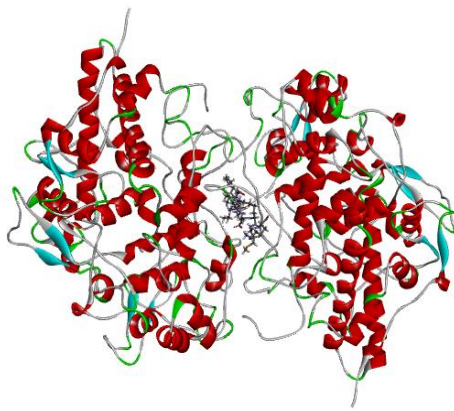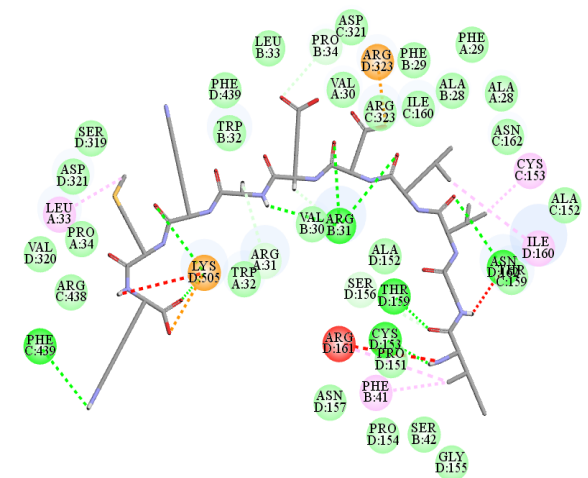

51

52



53 **Fig. S3**  
54 **300  $\mu\text{g/mL}$**

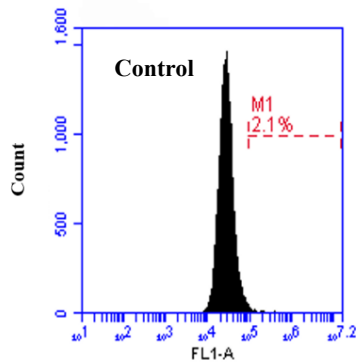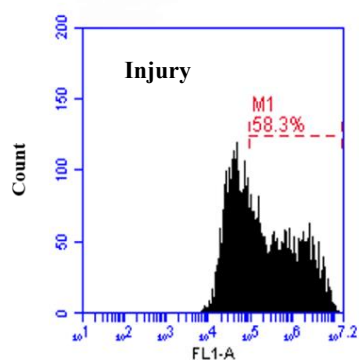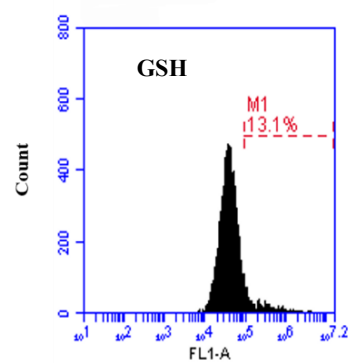

55

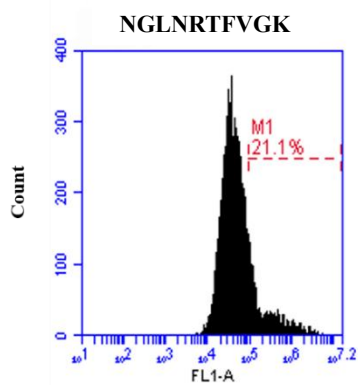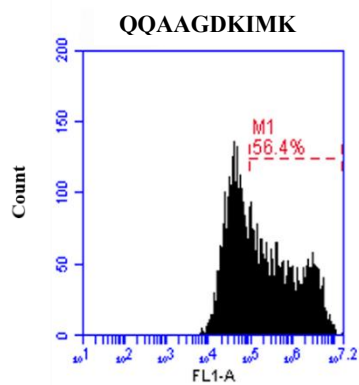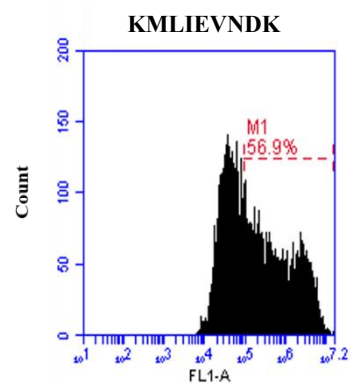

56

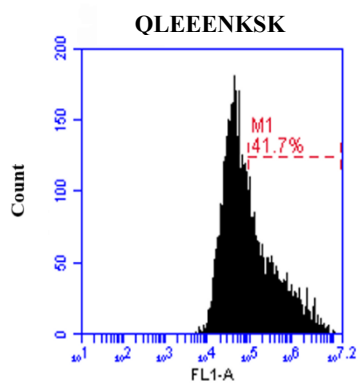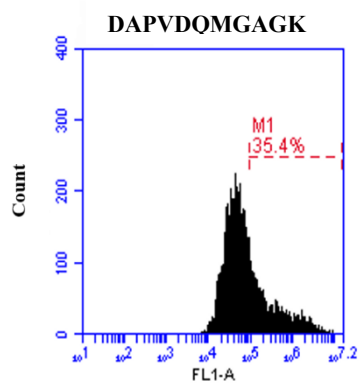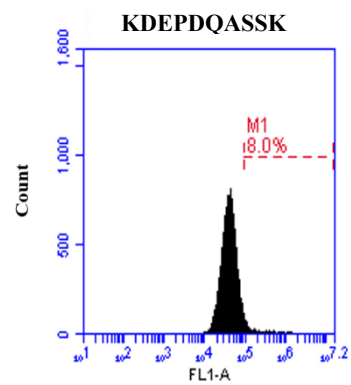

57

58

59 600 µg/mL

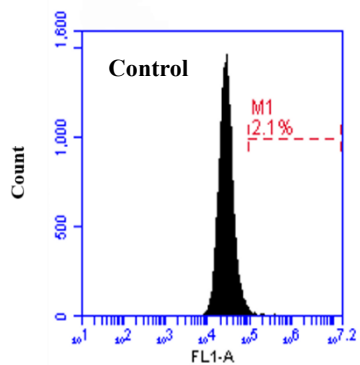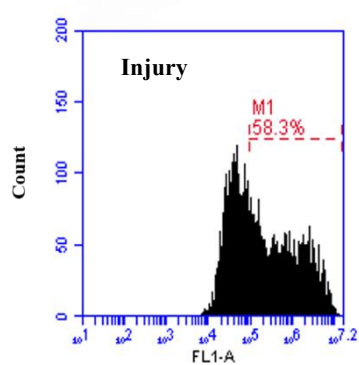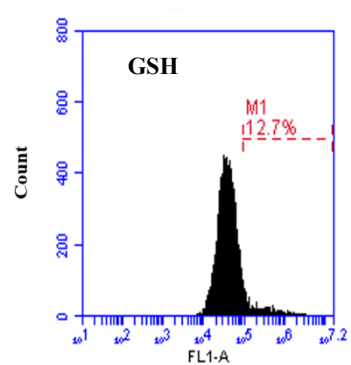

60

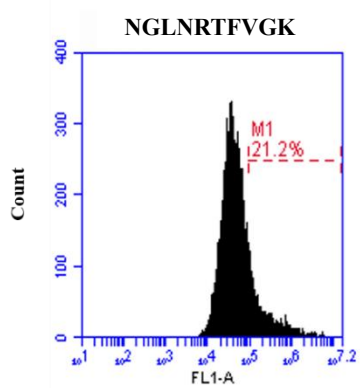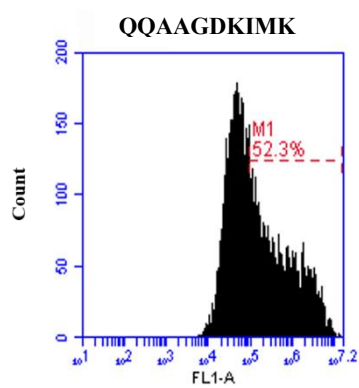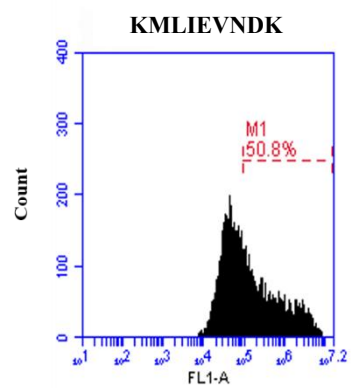

61

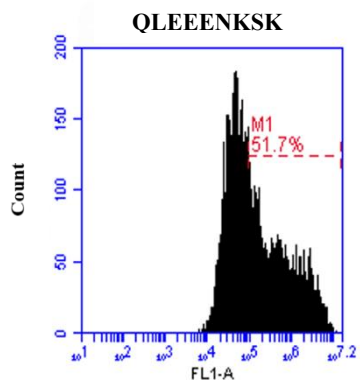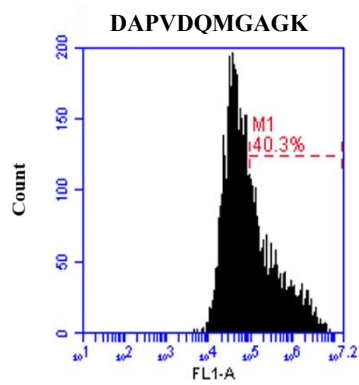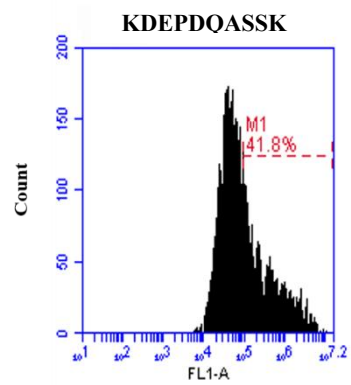

62
